# Supplementary material for: Temporal consistency and ecological validity of personality structure in common marmosets (Callithrix jacchus): A unifying field and laboratory approach
Source: PubMed Central journal article supplement (PMC7900989; doi:10.1002/ajp.23229), 2021-01-19
Supplement: AJP-83-e23229-s001.pdf [file AJP-83-e23229-s001.pdf]

**Supplemental Electronic Material****Temporal consistency and ecological validity of personality structure in common marmosets (*Callithrix jacchus*): A unifying field and laboratory approach**

Šlipogor, V.\*, Massen, J.J.M., Schiel, N., Souto, A. &amp; Bugnyar, T.

\*corresponding author**INDEX**

|                                                                                      |    |
|--------------------------------------------------------------------------------------|----|
| <b>Results</b> .....                                                                 | 2  |
| Captive Population.....                                                              | 2  |
| Wild Population .....                                                                | 2  |
| <b>References</b> .....                                                              | 3  |
| <b>Figure S1.</b> Test Set-up in Captivity .....                                     | 4  |
| <b>Figure S2.</b> Test Set-up in Wild.....                                           | 5  |
| <b>Table S1.</b> Individual Data on Marmosets .....                                  | 6  |
| <b>Table S2.</b> Temporal Repeatability in Captivity .....                           | 7  |
| <b>Table S3.</b> Temporal Repeatability in Wild .....                                | 9  |
| <b>Table S4.</b> Contextual Consistency in Captivity .....                           | 11 |
| <b>Table S5.</b> Contextual Consistency in Wild.....                                 | 12 |
| <b>Table S6.</b> REFA Personality Structure in Captivity .....                       | 13 |
| <b>Table S7.</b> REFA Personality Structure in Wild .....                            | 14 |
| <b>Table S8.</b> Best-fitting Models (GLMMs) of Personality Traits in Captivity..... | 15 |
| <b>Table S9.</b> Best-fitting Models (GLMMs) of Personality Traits in Wild .....     | 16 |
| <b>Table S10.</b> Personality Traits and Breeding Status in Captivity and Wild.....  | 18 |
| <b>Table S11.</b> PCA Personality Structure in Captivity, in PTB1 .....              | 19 |

## Results

### Captive population (UVI Austria)

We found that 58 out of 83 behavioral variables measured in all tests were significantly temporally repeatable across the two test sessions in PTB2 (Table S2), which was higher than in PTB1, in our previous report (Šlipogor et al. 2016). We averaged these temporally repeatable variables and assessed their contextual consistency across different tests (Table S4). We found that some of the variables showed significant cross-experimental consistency (e.g., *Enter<sup>L</sup>* across GA, NO, NF, FUR and P, ICC=0.651, 95% CI lower, upper=0.495, 0.794, F=10.330, P<0.001) and for these variables we again calculated a single mean value across tests, whereas other ones (e.g., *Manipulation<sup>D</sup>* was not consistent over NF and FUR) were kept for further analyses as unaveraged scores. To investigate how these variables were associated with each other as personality components, we entered them into a principal component analysis (PCA). At first, we entered 20 variables (all of which were temporally consistent, while 13 of them were also contextually consistent). Five of them (*Self-Grooming<sup>F</sup>*, *Inspection Cage<sup>F</sup>*, *Ingestion-Related Behaviour<sup>F</sup>*, *Inspection Lychee<sup>F</sup>*, *Route*) were then left out from the analyses in a stepwise manner, because of their lower loadings and unreliable factor solution in initial trial runs. In the final PCA, we entered 15 temporally repeatable variables (out of which 13 were contextually consistent). The analyses indicated appropriate sampling adequacy (Kaiser–Meyer–Olkin measure, KMO=0.618; Bartlett’s Test of Sphericity, P<0.001), and all variables had communality estimates >0.598 (*Stress Behavior<sup>F</sup>*). We extracted four personality components, based on eigenvalues (>1) and scree plot tests, which together explained 80.84% of the variance. Parallel analysis, however, indicated retaining first three components in the component solution (Table 3).

### Wild population (BBFS Brazil)

We found that 27 out of 92 behavioral variables measured in all tests were significantly repeatable across the two test sessions (Table S3). We calculated mean values of temporally repeatable

variables and those that showed a trend (with a Cronbach's  $\alpha > 0.5$ ) and tested their contextual consistency in different tests (Table S5). Some of the variables showed significant cross-experimental consistency (e.g., *Platform<sup>L</sup>* across GA, NO and SR, ICC=0.897, 95% CI lower, upper=0.791, 0.956, F=27.054, P<0.001), some showed a trend, with a Cronbach's  $\alpha > 0.5$ , and these variables were averaged across tests. The other non-contextually consistent variables were kept as unaveraged scores. First, we entered 17 variables (all temporally consistent, while 6 of them were also contextually consistent) into a PCA to investigate how they are associated with each other as personality components. Four of them (*Stress SUM<sup>F</sup>* in NO, *Body<sup>L</sup>* in NF, *Locomotion<sup>D</sup>* in SR, *Compartment Alternations<sup>F</sup>* in SR and P) were left out from the analyses in a stepwise manner, because of their lower loadings and unreliable factor solution in initial trial runs. In the final PCA, we entered 13 temporally repeatable variables (4 contextually consistent). The analyses indicated appropriate sampling adequacy (Kaiser–Meyer–Olkin measure, KMO=0.494; Bartlett's Test of Sphericity, P<0.001), and all variables had communality estimates >0.658 (*SUM Calls<sup>F</sup>* in NO). We extracted five main personality components, based on eigenvalues (>1) and scree plot tests, together explaining 84.48% of the variance. However, parallel analysis results indicated that only two components should be considered for the full personality structure (namely, Exploration-Avoidance and Boldness-Shyness in Foraging). We nevertheless decided to retain and further inspect all components, but we thus need to treat these results with caution (Table 4).

## References

Šlipogor, V., Gunhold-de Oliveira, T., Tadić, Z., Massen, J. J. M., & Bugnyar, T. (2016).

Consistent inter-individual differences in common marmosets (*Callithrix jacchus*) in Boldness-Shyness, Stress-Activity, and Exploration-Avoidance. *American Journal of Primatology*, 78(9), 961-973. <https://doi.org/10.1002/ajp.22566>

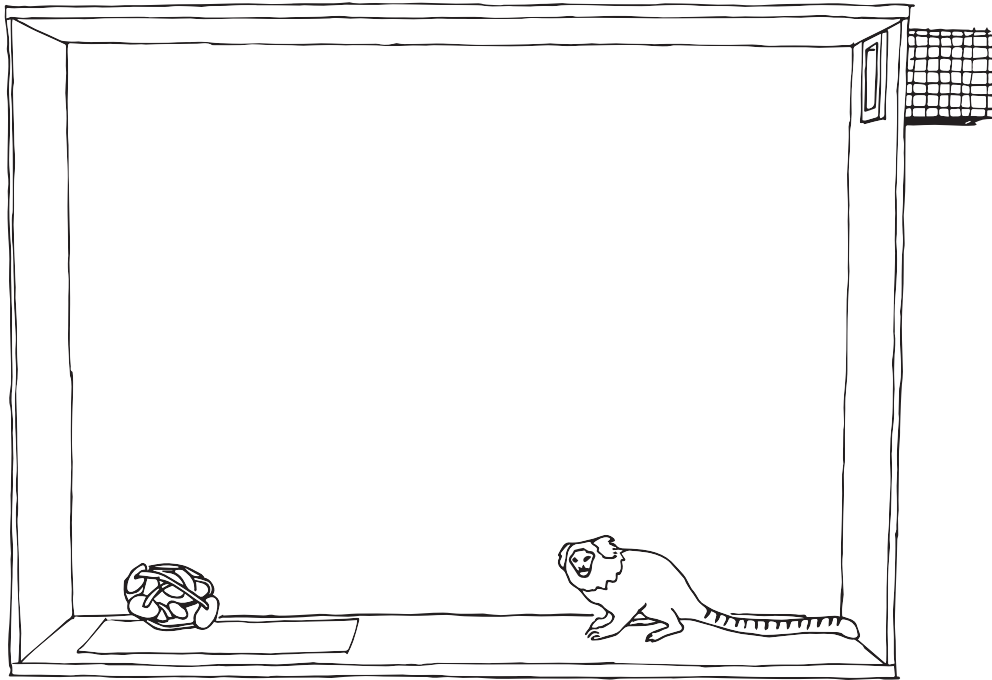

**Figure S1** Frontal view of the experimental cage with the NO set-up in UVI Austria.

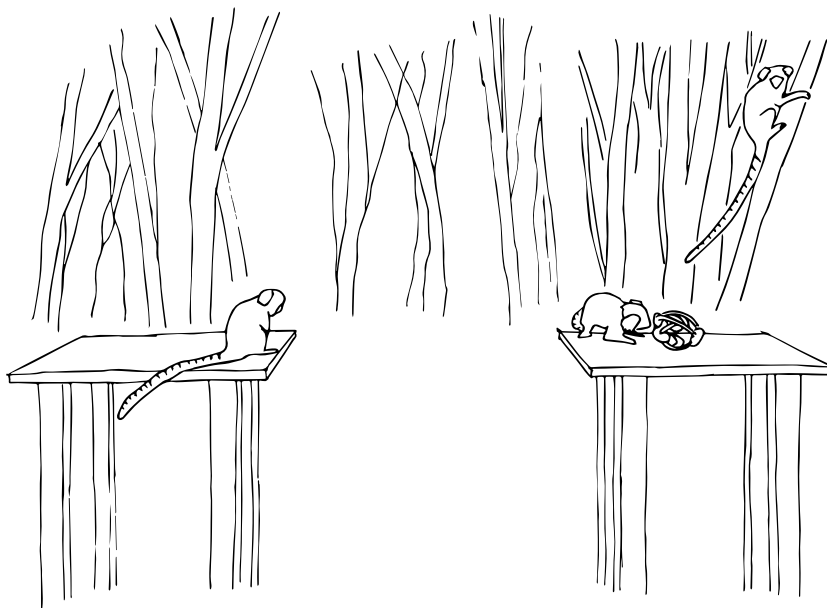

**Figure S2** Frontal view of the two wooden platforms with the NO set-up in BBFS Brazil.

**Table S1. Individual Data on Marmosets Tested in this Study.** Test location, group membership, name, age (UVI Austria; in years), approximate age (BBFS Brazil; A=adult, SA=subadult, J=juvenile), sex (M=male, F=female), social status (B=breeder, H=helper).

| Test Location | Group     | Individual  | Age | Sex | Status |
|---------------|-----------|-------------|-----|-----|--------|
| UVI Austria   | Ginevra   | Ernesto     | 11  | M   | B      |
|               |           | Ginevra     | 12  | F   | B      |
|               |           | Matilda     | 1   | F   | H      |
|               |           | Melvin      | 1   | M   | H      |
|               |           | Vincent     | 3   | M   | H      |
|               |           | Valentino   | 2   | M   | H      |
|               |           | Vento       | 6   | M   | H      |
|               | Vero      | 2           | M   | H   |        |
|               | Kiri      | Aurora      | 3   | F   | H      |
|               |           | Jack        | 9   | M   | H      |
|               |           | Luna        | 2   | F   | H      |
|               |           | Mink        | 10  | M   | H      |
|               |           | Nemo        | 10  | F   | H      |
|               |           | Oli         | 10  | F   | B      |
|               | Zaphod    | 13          | M   | B   |        |
|               | Pooh      | Fimo        | 13  | M   | H      |
|               |           | Locri       | 12  | M   | H      |
|               |           | Pandu       | 12  | F   | H      |
|               | Sparrow   | Kobold      | 10  | M   | H      |
|               |           | Nala        | 0.5 | F   | H      |
|               |           | Simba       | 0.5 | M   | H      |
|               |           | Smart       | 6   | M   | B      |
|               |           | Sparrow     | 9   | F   | B      |
|               | Veli      | Blinky Bill | 0.5 | M   | H      |
|               |           | Clever      | 6   | M   | B      |
|               |           | Veli        | 11  | F   | B      |
| Wall-E        |           | 0.5         | M   | H   |        |
| BBFS Brazil   | Casa      | Metuzalem   | A   | M   | B      |
|               |           | Baltazar    | A   | M   | H      |
|               |           | Amy         | A   | F   | B      |
|               |           | Kevin       | J   | M   | H      |
|               | Coqueiro  | Sansa       | A   | F   | B      |
|               |           | Dedinho     | A   | M   | B      |
|               |           | Arya        | SA  | F   | H      |
|               |           | Carmen      | SA  | F   | H      |
|               | Azul      | Azul        | A   | M   | B      |
|               |           | Nena        | A   | F   | B      |
|               |           | Emo         | J   | M   | H      |
|               | Star Wars | Leia        | A   | F   | B      |
|               |           | Luke        | A   | M   | B      |
|               |           | Darth Vader | J   | M   | H      |
|               | Vacas     | Branca      | A   | F   | B      |
|               |           | Fogo        | A   | M   | B      |
| Zustje        |           | J           | F   | H   |        |
| Broertje      |           | J           | M   | H   |        |

**Table S2. Temporal Repeatability in Captivity (UVI Austria).** Summary of all behavioral variables and their temporal consistency as intra-class correlation (ICC (3,1)) with 95% confidence intervals. Frequencies are noted with a letter ‘F’ in superscript (<sup>F</sup>), durations with a letter ‘D’ in superscript (<sup>D</sup>) and latencies with a letter ‘L’ in superscript (<sup>L</sup>). The significantly repeatable behavioral variables are shown in bold. Note that in NF and FUR tests, additional variables were measured; namely *Ingestion-Related Behavior*<sup>F</sup> in NF, and *Ingestion-Related Behavior*<sup>F</sup>, *Inspection Lychee*<sup>F</sup>, and *Route* in FUR.

| Test                       | Behavioral Variable                   | Cronbach's $\alpha$ | ICC (3,1)           | 95 % CI lower, upper    | F, P                     |
|----------------------------|---------------------------------------|---------------------|---------------------|-------------------------|--------------------------|
| GA                         | Enter <sup>L</sup>                    | <b>0.879</b>        | <b>0.784</b>        | <b>0.581, 0.896</b>     | <b>8.275, &lt;0.000</b>  |
|                            | Body <sup>L</sup>                     | <b>0.781</b>        | <b>0.640</b>        | <b>0.350, 0.818</b>     | <b>4.562, &lt;0.000</b>  |
|                            | Touch <sup>L</sup>                    | <b>0.718</b>        | <b>0.561</b>        | <b>0.236, 0.773</b>     | <b>3.552, 0.001</b>      |
|                            | Vigilance Calls <sup>F</sup>          | <b>0.520</b>        | <b>0.351</b>        | <b>-0.026, 0.641</b>    | <b>2.084, 0.033</b>      |
|                            | Contact Calls <sup>F</sup>            | 0.379               | 0.234               | -0.154, 0.559           | 1.610, 0.116             |
|                            | Food Calls <sup>F</sup>               | -0.223              | -0.100              | -0.457, 0.284           | 0.817, 0.694             |
|                            | Self-Grooming <sup>F</sup>            | -0.267              | -0.118              | -0.471, 0.268           | 0.789, 0.725             |
|                            | Stress Behavior <sup>F</sup>          | 0.236               | 0.134               | -0.253, 0.484           | 1.309, 0.248             |
|                            | Inspection Cage <sup>F</sup>          | 0.076               | 0.040               | -0.339, 0.407           | 1.082, 0.421             |
|                            | Compartment Alternations <sup>F</sup> | <b>0.769</b>        | <b>0.625</b>        | <b>0.328, 0.810</b>     | <b>4.335, &lt;0.000</b>  |
|                            | Locomotion <sup>D</sup>               | <b>0.844</b>        | <b>0.730</b>        | <b>0.490, 0.867</b>     | <b>6.419, &lt;0.000</b>  |
|                            | Proximity <sup>D</sup>                | <b>0.747</b>        | <b>0.596</b>        | <b>0.286, 0.793</b>     | <b>3.954, &lt;0.000</b>  |
|                            | Ground <sup>D</sup>                   | <b>0.666</b>        | <b>0.499</b>        | <b>0.154, 0.736</b>     | <b>2.991, 0.003</b>      |
|                            | Distance <sup>D</sup>                 | <b>0.879</b>        | <b>0.784</b>        | <b>0.580, 0.895</b>     | <b>8.256, &lt;0.000</b>  |
| Focus <sup>D</sup>         | <b>0.794</b>                          | <b>0.659</b>        | <b>0.378, 0.828</b> | <b>4.858, &lt;0.000</b> |                          |
| Manipulation <sup>D#</sup> | /                                     | /                   | /                   | /                       |                          |
| NO                         | Enter <sup>L</sup>                    | <b>0.876</b>        | <b>0.779</b>        | <b>0.571, 0.893</b>     | <b>8.044, &lt;0.000</b>  |
|                            | Body <sup>L</sup>                     | <b>0.485</b>        | <b>0.320</b>        | <b>-0.061, 0.620</b>    | <b>1.940, 0.049</b>      |
|                            | Touch <sup>L</sup>                    | -0.026              | -0.013              | -0.385, 0.363           | 0.975, 0.526             |
|                            | Vigilance Calls <sup>F</sup>          | <b>0.780</b>        | <b>0.640</b>        | <b>0.349, 0.818</b>     | <b>4.550, &lt;0.000</b>  |
|                            | Contact Calls <sup>F</sup>            | <b>0.979</b>        | <b>0.959</b>        | <b>0.913, 0.981</b>     | <b>48.346, &lt;0.000</b> |
|                            | Food Calls <sup>F</sup>               | 0.342               | 0.206               | -0.182, 0.539           | 1.520, 0.146             |
|                            | Self-Grooming <sup>F</sup>            | -0.241              | -0.108              | -0.463, 0.278           | 0.806, 0.707             |
|                            | Stress Behavior <sup>F</sup>          | <b>0.713</b>        | <b>0.554</b>        | <b>0.227, 0.768</b>     | <b>3.480, 0.001</b>      |
|                            | Inspection Cage <sup>F</sup>          | <b>0.503</b>        | <b>0.336</b>        | <b>-0.043, 0.631</b>    | <b>2.012, 0.040</b>      |
|                            | Compartment Alternations <sup>F</sup> | <b>0.951</b>        | <b>0.906</b>        | <b>0.806, 0.956</b>     | <b>20.382, &lt;0.000</b> |
|                            | Locomotion <sup>D</sup>               | <b>0.730</b>        | <b>0.575</b>        | <b>0.256, 0.781</b>     | <b>3.704, 0.001</b>      |
|                            | Proximity <sup>D</sup>                | <b>0.693</b>        | <b>0.530</b>        | <b>0.195, 0.754</b>     | <b>3.254, 0.002</b>      |
|                            | Ground <sup>D</sup>                   | <b>0.604</b>        | <b>0.433</b>        | <b>0.070, 0.694</b>     | <b>2.525, 0.011</b>      |
|                            | Distance <sup>D</sup>                 | <b>0.674</b>        | <b>0.508</b>        | <b>0.166, 0.741</b>     | <b>3.068, 0.003</b>      |
| Focus <sup>D</sup>         | <b>0.601</b>                          | <b>0.429</b>        | <b>0.066, 0.692</b> | <b>2.503, 0.011</b>     |                          |
| Manipulation <sup>D</sup>  | 0.087                                 | 0.045               | -0.334, 0.412       | 1.095, 0.409            |                          |
| NF                         | Enter <sup>L</sup>                    | <b>0.682</b>        | <b>0.518</b>        | <b>0.178, 0.747</b>     | <b>3.147, 0.002</b>      |
|                            | Body <sup>L</sup>                     | <b>0.764</b>        | <b>0.618</b>        | <b>0.318, 0.806</b>     | <b>4.239, &lt;0.000</b>  |
|                            | Touch <sup>L</sup>                    | <b>0.653</b>        | <b>0.485</b>        | <b>0.136, 0.727</b>     | <b>2.883, 0.004</b>      |
|                            | Vigilance Calls <sup>F</sup>          | 0.135               | 0.073               | -0.310, 0.435           | 1.157, 0.357             |
|                            | Contact Calls <sup>F</sup>            | 0.335               | 0.201               | -0.187, 0.535           | 1.504, 0.152             |
|                            | Food Calls <sup>F</sup>               | 0.012               | 0.006               | -0.369, 0.379           | 1.012, 0.488             |
|                            | Self-Grooming <sup>F</sup>            | 0.021               | 0.011               | -0.365, 0.383           | 1.021, 0.479             |
|                            | Stress Behavior <sup>F</sup>          | <b>0.715</b>        | <b>0.556</b>        | <b>0.230, 0.770</b>     | <b>3.505, 0.001</b>      |
|                            | Inspection Cage <sup>F</sup>          | <b>0.557</b>        | <b>0.386</b>        | <b>0.014, 0.664</b>     | <b>2.259, 0.021</b>      |
|                            | Compartment Alternations <sup>F</sup> | <b>0.652</b>        | <b>0.484</b>        | <b>0.134, 0.726</b>     | <b>2.875, 0.005</b>      |
|                            | Locomotion <sup>D</sup>               | <b>0.813</b>        | <b>0.684</b>        | <b>0.417, 0.843</b>     | <b>5.338, 0.000</b>      |
|                            | Proximity <sup>D</sup>                | <b>0.518</b>        | <b>0.350</b>        | <b>-0.028, 0.640</b>    | <b>2.075, 0.034</b>      |
|                            | Ground <sup>D</sup>                   | 0.434               | 0.278               | -0.108, 0.590           | 1.768, 0.076             |
|                            | Distance <sup>D</sup>                 | <b>0.633</b>        | <b>0.463</b>        | <b>0.108, 0.714</b>     | <b>2.728, 0.006</b>      |

|                                               |                                             |              |                     |                          |                          |
|-----------------------------------------------|---------------------------------------------|--------------|---------------------|--------------------------|--------------------------|
|                                               | <b>Focus<sup>D</sup></b>                    | <b>0.615</b> | <b>0.444</b>        | <b>0.084, 0.701</b>      | <b>2.595, 0.009</b>      |
|                                               | <b>Manipulation<sup>D</sup></b>             | <b>0.794</b> | <b>0.659</b>        | <b>0.378, 0.829</b>      | <b>4.865, &lt;0.000</b>  |
|                                               | Ingestion-Related Behavior <sup>F</sup>     | 0.145        | 0.078               | -0.304, 0.439            | 1.170, 0.346             |
| FUR                                           | <b>Enter<sup>L</sup></b>                    | <b>0.697</b> | <b>0.534</b>        | <b>0.201, 0.757</b>      | <b>3.295, 0.002</b>      |
|                                               | <b>Body<sup>L</sup></b>                     | <b>0.938</b> | <b>0.884</b>        | <b>0.762, 0.945</b>      | <b>16.253, &lt;0.000</b> |
|                                               | <b>Touch<sup>L</sup></b>                    | <b>0.933</b> | <b>0.874</b>        | <b>0.744, 0.941</b>      | <b>14.917, &lt;0.000</b> |
|                                               | Vigilance Calls <sup>F</sup>                | 0.427        | 0.272               | -0.114, 0.586            | 1.747, 0.081             |
|                                               | <b>Contact Calls<sup>F</sup></b>            | <b>0.573</b> | <b>0.402</b>        | <b>0.033, 0.674</b>      | <b>2.344, 0.017</b>      |
|                                               | <b>Food Calls<sup>F</sup></b>               | <b>0.934</b> | <b>0.877</b>        | <b>0.749, 0.942</b>      | <b>15.266, &lt;0.000</b> |
|                                               | Self-Grooming <sup>F</sup>                  | -0.261       | -0.115              | -0.469, 0.270            | 0.793, 0.720             |
|                                               | Stress Behavior <sup>F</sup>                | 0.269        | 0.155               | -0.232, 0.500            | 1.367, 0.215             |
|                                               | Inspection Cage <sup>F</sup>                | 0.436        | 0.279               | -0.106, 0.591            | 1.773, 0.075             |
|                                               | <b>Compartment Alternations<sup>F</sup></b> | <b>0.572</b> | <b>0.400</b>        | <b>0.031, 0.673</b>      | <b>2.336, 0.017</b>      |
|                                               | <b>Locomotion<sup>D</sup></b>               | <b>0.775</b> | <b>0.633</b>        | <b>0.339, 0.814</b>      | <b>4.443, &lt;0.000</b>  |
|                                               | <b>Proximity<sup>D</sup></b>                | <b>0.921</b> | <b>0.854</b>        | <b>0.705, 0.931</b>      | <b>12.666, &lt;0.000</b> |
|                                               | <b>Ground<sup>D</sup></b>                   | <b>0.947</b> | <b>0.900</b>        | <b>0.793, 0.953</b>      | <b>18.967, &lt;0.000</b> |
|                                               | <b>Distance<sup>D</sup></b>                 | <b>0.914</b> | <b>0.841</b>        | <b>0.682, 0.924</b>      | <b>11.613, &lt;0.000</b> |
|                                               | <b>Focus<sup>D</sup></b>                    | <b>0.793</b> | <b>0.657</b>        | <b>0.376, 0.828</b>      | <b>4.837, &lt;0.000</b>  |
|                                               | <b>Manipulation<sup>D</sup></b>             | <b>0.894</b> | <b>0.808</b>        | <b>0.623, 0.908</b>      | <b>9.439, &lt;0.000</b>  |
| <b>Ingestion-Related Behavior<sup>F</sup></b> | <b>0.698</b>                                | <b>0.536</b> | <b>0.202, 0.758</b> | <b>3.308, 0.002</b>      |                          |
| <b>Inspection Lychee<sup>F</sup></b>          | <b>0.973</b>                                | <b>0.948</b> | <b>0.888, 0.976</b> | <b>37.108, &lt;0.000</b> |                          |
| <b>Route</b>                                  | <b>0.802</b>                                | <b>0.669</b> | <b>0.393, 0.834</b> | <b>5.041, &lt;0.000</b>  |                          |
| P                                             | <b>Enter<sup>L</sup></b>                    | <b>0.916</b> | <b>0.845</b>        | <b>0.688, 0.926</b>      | <b>11.881, &lt;0.000</b> |
|                                               | <b>Body<sup>L</sup></b>                     | <b>0.578</b> | <b>0.406</b>        | <b>0.038, 0.677</b>      | <b>2.367, 0.016</b>      |
|                                               | Touch <sup>L#</sup>                         | /            | /                   | /                        | /                        |
|                                               | <b>Vigilance Calls<sup>F</sup></b>          | <b>0.775</b> | <b>0.633</b>        | <b>0.339, 0.814</b>      | <b>4.443, &lt;0.000</b>  |
|                                               | <b>Contact Calls<sup>F</sup></b>            | <b>0.820</b> | <b>0.695</b>        | <b>0.434, 0.848</b>      | <b>5.554, &lt;0.000</b>  |
|                                               | Food Calls <sup>F</sup>                     | -0.230       | -0.103              | -0.459, 0.282            | 0.813, 0.699             |
|                                               | Self-Grooming <sup>F</sup>                  | -0.360       | -0.152              | -0.498, 0.235            | 0.736, 0.781             |
|                                               | <b>Stress Behavior<sup>F</sup></b>          | <b>0.576</b> | <b>0.405</b>        | <b>0.037, 0.676</b>      | <b>2.361, 0.016</b>      |
|                                               | <b>Inspection Cage<sup>F</sup></b>          | <b>0.781</b> | <b>0.640</b>        | <b>0.350, 0.818</b>      | <b>4.557, &lt;0.000</b>  |
|                                               | <b>Compartment Alternations<sup>F</sup></b> | <b>0.882</b> | <b>0.789</b>        | <b>0.588, 0.898</b>      | <b>8.471, &lt;0.000</b>  |
|                                               | <b>Locomotion<sup>D</sup></b>               | <b>0.785</b> | <b>0.646</b>        | <b>0.359, 0.822</b>      | <b>4.656, &lt;0.000</b>  |
|                                               | Proximity <sup>D</sup>                      | 0.094        | 0.049               | -0.331, 0.416            | 1.104, 0.402             |
|                                               | Ground <sup>D</sup>                         | 0.060        | 0.031               | -0.347, 0.400            | 1.064, 0.438             |
|                                               | <b>Distance<sup>D</sup></b>                 | <b>0.839</b> | <b>0.723</b>        | <b>0.478, 0.863</b>      | <b>6.218, &lt;0.000</b>  |
| <b>Focus<sup>D</sup></b>                      | <b>0.891</b>                                | <b>0.803</b> | <b>0.613, 0.905</b> | <b>9.143, &lt;0.000</b>  |                          |
| Manipulation <sup>D#</sup>                    | /                                           | /            | /                   | /                        |                          |

# Note that for these behavioral variables we were unable to compute the ICC values, due to zero variance.



**Table S3. Temporal Repeatability in Wild (BBFS Brazil).** Summary of all behavioral variables and their temporal consistency as intra-class correlation (ICC (3,1)) with 95% confidence intervals. Frequencies are noted with a letter ‘F’, durations with a letter ‘D’ and latencies with a letter ‘L’ in superscript. The significantly repeatable behavioral variables are shown in bold, variables that show a trend (i.e., Cronbach’s  $\alpha > 0.5$ ) are shown in bold italic. Note that in NF and SR, additional variables were measured; namely *Nb Eaten Target*<sup>F</sup> in NF and *Return*<sup>L</sup> in SR.

| Test                       | Behavioral Variable                        | Cronbach's $\alpha$ | ICC (3,1)     | 95 % CI lower, upper | F, P                 |
|----------------------------|--------------------------------------------|---------------------|---------------|----------------------|----------------------|
| GA                         | Compartment Alternations <sup>F</sup>      | -0.154              | -0.071        | -0.510, 0.397        | 0.867, 0.614         |
|                            | <b>Stress Behavior<sup>F</sup></b>         | <b>0.622</b>        | <b>0.452</b>  | <b>-0.005, 0.752</b> | <b>2.648, 0.026</b>  |
|                            | Self-Grooming <sup>F</sup>                 | -0.214              | -0.097        | -0.529, 0.375        | 0.824, 0.653         |
|                            | Vigilance Calls <sup>F</sup>               | 0.395               | 0.246         | -0.236, 0.631        | 1.653, 0.155         |
|                            | <b>Contact Calls<sup>F</sup></b>           | <b>0.565</b>        | <b>0.393</b>  | <b>-0.076, 0.720</b> | <b>2.297, 0.048</b>  |
|                            | Food Calls <sup>F</sup>                    | -0.047              | -0.023        | -0.474, 0.437        | 0.955, 0.537         |
|                            | SUM Calls <sup>F</sup>                     | 0.273               | 0.158         | -0.320, 0.573        | 1.376, 0.259         |
|                            | Socio-Negative Initiate <sup>F</sup>       | -0.667              | -0.250        | -0.633, 0.232        | 0.600, 0.849         |
|                            | Socio-Positive Initiate <sup>F#</sup>      | /                   | /             | /                    | /                    |
|                            | <b>Platform<sup>L</sup></b>                | <b>0.988</b>        | <b>0.976</b>  | <b>0.938, 0.991</b>  | <b>83.882, 0.000</b> |
|                            | Body <sup>L</sup>                          | -0.031              | -0.015        | -0.468, 0.443        | 0.970, 0.525         |
|                            | Touch <sup>L#</sup>                        | /                   | /             | /                    | /                    |
|                            | Locomotion <sup>D</sup>                    | 0.399               | 0.249         | -0.233, 0.633        | 1.663, 0.152         |
|                            | Platform <sup>D</sup>                      | -0.095              | -0.046        | -0.491, 0.419        | 0.913, 0.573         |
|                            | Proximity <sup>D</sup>                     | -0.697              | -0.259        | -0.639, 0.223        | 0.589, 0.857         |
|                            | Distance <sup>D</sup>                      | 0.029               | 0.015         | -0.444, 0.467        | 1.030, 0.476         |
| Focus <sup>D</sup>         | 0.106                                      | 0.056               | -0.410, 0.499 | 1.119, 0.410         |                      |
| Manipulation <sup>D#</sup> | /                                          | /                   | /             | /                    |                      |
| NO                         | Compartment Alternations <sup>F</sup>      | 0.349               | 0.212         | -0.270, 0.609        | 1.537, 0.192         |
|                            | <b>Stress Behavior<sup>F</sup></b>         | <b>0.605</b>        | <b>0.433</b>  | <b>-0.028, 0.742</b> | <b>2.528, 0.032</b>  |
|                            | Self-Grooming <sup>F</sup>                 | 0.335               | 0.201         | -0.280, 0.602        | 1.504, 0.204         |
|                            | <b>Vigilance Calls<sup>F</sup></b>         | <b>0.671</b>        | <b>0.504</b>  | <b>0.063, 0.781</b>  | <b>3.035, 0.014</b>  |
|                            | <b>Contact Calls<sup>F</sup></b>           | <b>0.599</b>        | <b>0.427</b>  | <b>-0.035, 0.739</b> | <b>2.492, 0.034</b>  |
|                            | <b>Food Calls<sup>F</sup></b>              | <b>0.675</b>        | <b>0.510</b>  | <b>0.070, 0.783</b>  | <b>3.079, 0.013</b>  |
|                            | <b>SUM Calls<sup>F</sup></b>               | <b>0.579</b>        | <b>0.407</b>  | <b>-0.059, 0.728</b> | <b>2.375, 0.042</b>  |
|                            | <b>Socio-Negative Initiate<sup>F</sup></b> | <b>0.839</b>        | <b>0.722</b>  | <b>0.397, 0.886</b>  | <b>6.200, 0.000</b>  |
|                            | <b>Socio-Positive Initiate<sup>F</sup></b> | <b>0.518</b>        | <b>0.349</b>  | <b>-0.126, 0.694</b> | <b>2.074, 0.071</b>  |
|                            | <b>Platform<sup>L</sup></b>                | <b>0.574</b>        | <b>0.403</b>  | <b>-0.065, 0.725</b> | <b>2.349, 0.044</b>  |
|                            | Body <sup>L</sup>                          | 0.431               | 0.275         | -0.207, 0.649        | 1.757, 0.128         |
|                            | <b>Touch<sup>L</sup></b>                   | <b>0.523</b>        | <b>0.354</b>  | <b>-0.121, 0.697</b> | <b>2.097, 0.068</b>  |
|                            | Locomotion <sup>D</sup>                    | 0.443               | 0.284         | -0.197, 0.655        | 1.794, 0.119         |
|                            | <b>Platform<sup>D</sup></b>                | <b>0.510</b>        | <b>0.343</b>  | <b>-0.134, 0.690</b> | <b>2.043, 0.075</b>  |
|                            | Proximity <sup>D</sup>                     | -0.474              | -0.192        | -0.595, 0.289        | 0.678, 0.784         |
|                            | <b>Distance<sup>D</sup></b>                | <b>0.621</b>        | <b>0.451</b>  | <b>-0.006, 0.752</b> | <b>2.640, 0.026</b>  |
| Focus <sup>D</sup>         | 0.260                                      | 0.150               | -0.328, 0.567 | 1.352, 0.270         |                      |
| Manipulation <sup>D</sup>  | 0.385                                      | 0.238               | -0.244, 0.626 | 1.625, 0.163         |                      |
| NF                         | Compartment Alternations <sup>F</sup>      | 0.342               | 0.206         | -0.275, 0.605        | 1.519, 0.199         |
|                            | Nb Eaten Target <sup>F</sup>               | 0.157               | 0.085         | -0.385, 0.521        | 1.187, 0.364         |
|                            | Stress Behavior <sup>F</sup>               | 0.120               | 0.064         | -0.403, 0.505        | 1.137, 0.397         |
|                            | Self-Grooming <sup>F</sup>                 | -0.353              | -0.150        | -0.567, 0.328        | 0.739, 0.730         |
|                            | <b>Vigilance Calls<sup>F</sup></b>         | <b>0.788</b>        | <b>0.651</b>  | <b>0.277, 0.853</b>  | <b>4.725, 0.001</b>  |
|                            | Contact Calls <sup>F</sup>                 | 0.365               | 0.223         | -0.259, 0.616        | 1.574, 0.180         |
|                            | Food Calls <sup>F</sup>                    | 0.118               | 0.062         | -0.405, 0.504        | 1.133, 0.400         |
|                            | <b>SUM Calls<sup>F</sup></b>               | <b>0.697</b>        | <b>0.535</b>  | <b>0.105, 0.796</b>  | <b>3.298, 0.009</b>  |
|                            | <b>Socio-Negative Initiate<sup>F</sup></b> | <b>0.710</b>        | <b>0.550</b>  | <b>0.126, 0.804</b>  | <b>3.445, 0.007</b>  |
|                            | Socio-Positive Initiate <sup>F#</sup>      | /                   | /             | /                    | /                    |
| Platform <sup>L</sup>      | 0.488                                      | 0.322               | -0.156, 0.678 | 1.951, 0.089         |                      |

|    |                                             |                                             |              |                      |                       |                     |
|----|---------------------------------------------|---------------------------------------------|--------------|----------------------|-----------------------|---------------------|
|    | <b>Body<sup>L</sup></b>                     | <b>0.615</b>                                | <b>0.444</b> | <b>-0.014, 0.748</b> | <b>2.599, 0.028</b>   |                     |
|    | Touch <sup>L</sup>                          | 0.482                                       | 0.318        | -0.161, 0.675        | 1.931, 0.093          |                     |
|    | Locomotion <sup>D</sup>                     | -0.375                                      | -0.158       | -0.572, 0.321        | 0.727, 0.741          |                     |
|    | <b>Platform<sup>D</sup></b>                 | <b>0.894</b>                                | <b>0.808</b> | <b>0.557, 0.923</b>  | <b>9.404, 0.000</b>   |                     |
|    | <b>Proximity<sup>D</sup></b>                | <b>0.836</b>                                | <b>0.718</b> | <b>0.390, 0.884</b>  | <b>6.088, 0.000</b>   |                     |
|    | <b>Distance<sup>D</sup></b>                 | <b>0.922</b>                                | <b>0.855</b> | <b>0.655, 0.943</b>  | <b>12.817, 0.000</b>  |                     |
|    | <b>Focus<sup>D</sup></b>                    | <b>0.676</b>                                | <b>0.511</b> | <b>0.072, 0.784</b>  | <b>3.087, 0.013</b>   |                     |
|    | Manipulation <sup>D</sup>                   | 0.354                                       | 0.215        | -0.267, 0.611        | 1.547, 0.188          |                     |
|    | <b>Compartment Alternations<sup>F</sup></b> | <b>0.557</b>                                | <b>0.386</b> | <b>-0.084, 0.716</b> | <b>2.258, 0.051</b>   |                     |
|    | Stress Behavior <sup>F</sup>                | 0.396                                       | 0.247        | -0.235, 0.631        | 1.655, 0.154          |                     |
|    | Self-Grooming <sup>F</sup>                  | 0.350                                       | 0.212        | -0.269, 0.609        | 1.539, 0.191          |                     |
|    | Vigilance Calls <sup>F</sup>                | -0.173                                      | -0.080       | -0.516, 0.390        | 0.853, 0.627          |                     |
|    | Contact Calls <sup>F</sup>                  | -0.124                                      | -0.058       | -0.500, 0.408        | 0.890, 0.594          |                     |
|    | <b>Food Calls<sup>F</sup></b>               | <b>0.747</b>                                | <b>0.596</b> | <b>0.193, 0.827</b>  | <b>3.951, 0.004</b>   |                     |
|    | SUM Calls <sup>F</sup>                      | 0.478                                       | 0.314        | -0.165, 0.673        | 1.915, 0.095          |                     |
|    | Socio-Negative Initiate <sup>F</sup>        | 0.221                                       | 0.125        | -0.351, 0.549        | 1.284, 0.306          |                     |
|    | Socio-Positive Initiate <sup>F#</sup>       | /                                           | /            | /                    | /                     |                     |
| SR | <b>Platform<sup>L</sup></b>                 | <b>0.879</b>                                | <b>0.784</b> | <b>0.511, 0.913</b>  | <b>8.259, 0.000</b>   |                     |
|    | Body <sup>L</sup>                           | -0.044                                      | -0.022       | -0.473, 0.438        | 0.957, 0.535          |                     |
|    | Touch <sup>L</sup>                          | -0.061                                      | -0.030       | -0.479, 0.432        | 0.943, 0.548          |                     |
|    | <b>Return<sup>L</sup></b>                   | <b>0.999</b>                                | <b>0.998</b> | <b>0.995, 0.999</b>  | <b>977.692, 0.000</b> |                     |
|    | <b>Locomotion<sup>D</sup></b>               | <b>0.747</b>                                | <b>0.596</b> | <b>0.192, 0.827</b>  | <b>3.948, 0.004</b>   |                     |
|    | Platform <sup>D</sup>                       | 0.098                                       | 0.052        | -0.413, 0.496        | 1.109, 0.417          |                     |
|    | Proximity <sup>D</sup>                      | 0.497                                       | 0.330        | -0.147, 0.683        | 1.986, 0.084          |                     |
|    | Distance <sup>D</sup>                       | 0.365                                       | 0.223        | -0.259, 0.616        | 1.574, 0.179          |                     |
|    | <b>Focus<sup>D</sup></b>                    | <b>0.598</b>                                | <b>0.426</b> | <b>-0.036, 0.738</b> | <b>2.486, 0.034</b>   |                     |
|    | Manipulation <sup>D</sup>                   | 0.332                                       | 0.199        | -0.282, 0.600        | 1.497, 0.207          |                     |
|    |                                             | <b>Compartment Alternations<sup>F</sup></b> | <b>0.512</b> | <b>0.344</b>         | <b>-0.132, 0.691</b>  | <b>2.049, 0.075</b> |
|    |                                             | Stress Behavior <sup>F</sup>                | -0.180       | -0.083               | -0.519, 0.387         | 0.847, 0.632        |
|    |                                             | Self-Grooming <sup>F</sup>                  | -0.395       | -0.165               | -0.577, 0.314         | 0.717, 0.750        |
|    | Vigilance Calls <sup>F</sup>                | -0.829                                      | -0.293       | -0.660, 0.188        | 0.547, 0.888          |                     |
|    | Contact Calls <sup>F</sup>                  | 0.361                                       | 0.220        | -0.262, 0.614        | 1.564, 0.183          |                     |
|    | <b>Food Calls<sup>F</sup></b>               | <b>0.821</b>                                | <b>0.696</b> | <b>0.352, 0.874</b>  | <b>5.572, 0.000</b>   |                     |
|    | SUM Calls <sup>F</sup>                      | -0.625                                      | -0.238       | -0.626, 0.244        | 0.616, 0.837          |                     |
|    | Socio-Negative Initiate <sup>F</sup>        | -0.178                                      | -0.082       | -0.518, 0.388        | 0.849, 0.630          |                     |
|    | Socio-Positive Initiate <sup>F#</sup>       | /                                           | /            | /                    | /                     |                     |
| P  | Platform <sup>L</sup>                       | 0.416                                       | 0.263        | -0.219, 0.641        | 1.712, 0.139          |                     |
|    | <b>Body<sup>L</sup></b>                     | <b>0.573</b>                                | <b>0.402</b> | <b>-0.066, 0.725</b> | <b>2.343, 0.044</b>   |                     |
|    | Touch <sup>L#</sup>                         | /                                           | /            | /                    | /                     |                     |
|    | Locomotion <sup>D</sup>                     | 0.352                                       | 0.213        | -0.268, 0.610        | 1.543, 0.190          |                     |
|    | <b>Platform<sup>D</sup></b>                 | <b>0.615</b>                                | <b>0.445</b> | <b>-0.014, 0.748</b> | <b>2.601, 0.028</b>   |                     |
|    | Proximity <sup>D</sup>                      | 0.039                                       | 0.020        | -0.440, 0.471        | 1.040, 0.468          |                     |
|    | Distance <sup>D</sup>                       | -1.062                                      | -0.347       | -0.693, 0.129        | 0.485, 0.927          |                     |
|    | Focus <sup>D</sup>                          | -1.218                                      | -0.379       | -0.711, 0.093        | 0.451, 0.945          |                     |
|    | Manipulation <sup>D#</sup>                  | /                                           | /            | /                    | /                     |                     |

# Note that for these behavioral variables we were unable to compute the ICC values, due to zero variance.

**Table S4. Contextual Consistency in Captivity (UVI Austria)** of the same behavioral variables across different tests. Frequencies of behavioral variables are indicated with a letter ‘F’ (<sup>F</sup>), durations with a letter ‘D’ (<sup>D</sup>) and latencies with a letter ‘L’ in superscript (<sup>L</sup>). Significantly consistent variables are depicted in bold. Significantly consistent variables were taken into further analyses as averaged scores, whereas those that did not show consistency were taken separately into further analyses.

| Behavioral Variable                      | Tests              | Cronbach's $\alpha$ | ICC          | 95% CI lower, upper | F, P                     |
|------------------------------------------|--------------------|---------------------|--------------|---------------------|--------------------------|
| Enter <sup>L</sup>                       | GA, NO, NF, FUR, P | <b>0.903</b>        | <b>0.651</b> | <b>0.495, 0.794</b> | <b>10.330, &lt;0.000</b> |
| Body <sup>L</sup>                        | GA, NO, NF, FUR, P | <b>0.799</b>        | <b>0.443</b> | <b>0.269, 0.637</b> | <b>4.976, &lt;0.000</b>  |
| Touch <sup>L</sup>                       | GA, NF, FUR        | <b>0.538</b>        | <b>0.280</b> | <b>0.045, 0.533</b> | <b>2.165, 0.009</b>      |
| Vigilance Calls <sup>F</sup>             | GA, NO, P          | <b>0.566</b>        | <b>0.303</b> | <b>0.067, 0.553</b> | <b>2.302, 0.005</b>      |
| Contact Calls <sup>F</sup>               | NO, FUR, P         | <b>0.936</b>        | <b>0.829</b> | <b>0.706, 0.911</b> | <b>15.545, &lt;0.000</b> |
| Food Calls <sup>F</sup>                  | FUR                | /                   | /            | /                   | /                        |
| Self-Grooming <sup>F</sup>               | /                  | /                   | /            | /                   | /                        |
| Stress Behavior <sup>F</sup>             | NO, NF, P          | <b>0.701</b>        | <b>0.439</b> | <b>0.204, 0.661</b> | <b>3.349, &lt;0.000</b>  |
| Inspection Cage <sup>F</sup>             | NO, NF, P          | <b>0.620</b>        | <b>0.353</b> | <b>0.115, 0.594</b> | <b>2.634, 0.001</b>      |
| Compartment Alternations <sup>F</sup>    | GA, NO, NF, FUR, P | <b>0.885</b>        | <b>0.606</b> | <b>0.442, 0.763</b> | <b>8.698, &lt;0.000</b>  |
| Locomotion <sup>D</sup>                  | GA, NO, NF, FUR, P | <b>0.884</b>        | <b>0.603</b> | <b>0.439, 0.761</b> | <b>8.598, &lt;0.000</b>  |
| Proximity <sup>D</sup>                   | GA, NO, NF, FUR    | <b>0.739</b>        | <b>0.414</b> | <b>0.220, 0.624</b> | <b>3.827, &lt;0.000</b>  |
| Ground <sup>D</sup>                      | GA, NO, FUR        | <b>0.778</b>        | <b>0.538</b> | <b>0.314, 0.732</b> | <b>4.497, &lt;0.000</b>  |
| Distance <sup>D</sup>                    | GA, NO, NF, FUR, P | <b>0.864</b>        | <b>0.559</b> | <b>0.389, 0.728</b> | <b>7.328, &lt;0.000</b>  |
| Focus <sup>D</sup>                       | GA, NO, NF, FUR, P | <b>0.729</b>        | <b>0.349</b> | <b>0.181, 0.555</b> | <b>3.685, &lt;0.000</b>  |
| Manipulation <sup>D</sup>                | NF, FUR            | -0.067              | -0.033       | -0.402, 0.345       | 0.937, 0.565             |
| Ingestion-Related Behavior <sup>F*</sup> | FUR                | /                   | /            | /                   | /                        |
| Inspection Lychee <sup>F*</sup>          | FUR                | /                   | /            | /                   | /                        |
| Route <sup>*</sup>                       | FUR                | /                   | /            | /                   | /                        |

\* Note that these behavioral variables were initially taken into further analyses, even though they showed only temporal repeatability in one test (FUR). However, together with behavioral variable *Inspection Cage*<sup>F</sup> they were left out from the principal component analyses in a stepwise manner, because of their lower loadings and unreliable factor solution. Note that behavioral variable *Self-Grooming*<sup>F</sup> was not taken into further analyses.

**Table S5. Contextual Consistency in Wild (BBFS Brazil)** of the same behavioral variables across different tests. Frequencies of behavioral variables are indicated with a letter ‘F’, durations with ‘D’ and latencies with ‘L’ in superscript. Significantly consistent variables are in bold, behaviors that show a trend (i.e., Cronbach’s  $\alpha > 0.5$ ) are depicted in bold italic. Both significantly consistent variables, and those that showed a trend were taken into further analyses as averaged scores, whereas those that did not show consistency were taken separately into further analyses.

| Behavioral Variable                                | Tests                    | Cronbach's $\alpha$ | ICC                 | 95% CI lower, upper         | F, P                        |
|----------------------------------------------------|--------------------------|---------------------|---------------------|-----------------------------|-----------------------------|
| <b><i>Compartment Alternations<sup>F</sup></i></b> | <b><i>SR, P</i></b>      | <b><i>0.555</i></b> | <b><i>0.384</i></b> | <b><i>-0.087, 0.714</i></b> | <b><i>2.245, 0.052</i></b>  |
| Stress Behavior <sup>F</sup>                       | GA, NO                   | 0.443               | 0.285               | -0.196, 0.655               | 1.796, 0.119                |
| Self-Grooming <sup>F#</sup>                        | /                        | /                   | /                   | /                           | /                           |
| Vigilance Calls <sup>F#</sup>                      | NO, NF                   | 0.647               | 0.478               | 0.028, 0.766                | 2.829, 0.019                |
| Contact Calls <sup>F#</sup>                        | GA, NO                   | -0.439              | -0.180              | -0.587, 0.300               | 0.695, 0.770                |
| <b><i>Food Calls<sup>F#</sup></i></b>              | <b><i>NO, SR, P</i></b>  | <b><i>0.853</i></b> | <b><i>0.659</i></b> | <b><i>0.411, 0.840</i></b>  | <b><i>6.792, 0.000</i></b>  |
| SUM Calls <sup>F</sup>                             | NO, NF                   | 0.257               | 0.148               | -0.330, 0.565               | 1.347, 0.273                |
| <b><i>Platform<sup>L</sup></i></b>                 | <b><i>GA, NO, SR</i></b> | <b><i>0.963</i></b> | <b><i>0.897</i></b> | <b><i>0.791, 0.956</i></b>  | <b><i>27.054, 0.000</i></b> |
| Body <sup>L</sup>                                  | NF, P                    | 0.265               | 0.152               | -0.326, 0.569               | 1.360, 0.267                |
| Touch <sup>L</sup>                                 | NO                       | /                   | /                   | /                           | /                           |
| Return <sup>L</sup>                                | SR                       | /                   | /                   | /                           | /                           |
| <b><i>Socio-Negative Initiate<sup>F</sup></i></b>  | <b><i>NO, NF</i></b>     | <b><i>0.765</i></b> | <b><i>0.620</i></b> | <b><i>0.229, 0.839</i></b>  | <b><i>4.259, 0.002</i></b>  |
| Socio-Positive Initiate <sup>F</sup>               | NO                       | /                   | /                   | /                           | /                           |
| Locomotion <sup>D</sup>                            | SR                       | /                   | /                   | /                           | /                           |
| <b><i>Platform<sup>D</sup></i></b>                 | <b><i>NO, NF, P</i></b>  | <b><i>0.594</i></b> | <b><i>0.328</i></b> | <b><i>0.039, 0.630</i></b>  | <b><i>2.464, 0.012</i></b>  |
| Proximity <sup>D</sup>                             | NF                       | /                   | /                   | /                           | /                           |
| <b><i>Distance<sup>D</sup></i></b>                 | <b><i>NO, NF</i></b>     | <b><i>0.535</i></b> | <b><i>0.365</i></b> | <b><i>-0.108, 0.704</i></b> | <b><i>2.152, 0.062</i></b>  |
| <b><i>Focus<sup>D</sup></i></b>                    | <b><i>NF, SR</i></b>     | <b><i>0.838</i></b> | <b><i>0.721</i></b> | <b><i>0.395, 0.886</i></b>  | <b><i>6.166, 0.000</i></b>  |
| Manipulation <sup>D</sup>                          | /                        | /                   | /                   | /                           | /                           |

#Note that behavioral variable *Self-Grooming<sup>F</sup>* did not show any temporal consistency, so was not taken into further analyses. The initial PCA runs showed that the solution without *Vigilance Calls<sup>F</sup>*, *Contact Calls<sup>F</sup>* and *Food Calls<sup>F</sup>* showed a better fit, so only their composite variable, *SUM Calls<sup>F</sup>*, was taken into further analyses.

1 **Table S6. REFA Personality Structure of Common Marmosets in Captivity (ACF Vienna) in PTB2.** Variable loadings in regularized  
 2 exploratory factor analysis (REFA), unweighted least squares extraction method together with parallel analysis results. Quartimax rotation with  
 3 Kaiser normalization. Loadings  $>0.4$  and  $<-0.4$  were considered as salient, and high loadings  $>0.7$  and  $<-0.7$  are indicated in bold.  
 4 Communalities indicate a proportion of each variable's variance that can be explained by the factors. Eigenvalues indicate eigenvalues as  
 5 obtained by the REFA. Percentiles indicate eigenvalues as obtained by parallel analysis with 1000 iterations. Eigenvalues larger than percentiles  
 6 are indicated with asterisk (\*). Spearman's correlations indicate correspondence of REFA components with corresponding PCA components.

|                                                            | Component             |                 |                  |             | Communalities |
|------------------------------------------------------------|-----------------------|-----------------|------------------|-------------|---------------|
|                                                            | Exploration-Avoidance | Stress/Activity | Boldness-Shyness | Fourth      |               |
| <b>Eigenvalues</b>                                         | 5.524*                | 2.978*          | 2.127*           | 1.496       |               |
| <b>Percentiles</b>                                         | 2.946                 | 2.391           | 2.023            | 1.752       |               |
| <b>% Variance</b>                                          | 36.83                 | 19.86           | 14.18            | 9.98        |               |
| <b>P</b>                                                   | <0.001                | <0.001          | <0.001           | <0.001      |               |
| <b>r<sub>s</sub></b>                                       | 0.936                 | 0.896           | 0.961            | 0.937       |               |
| Ground <sup>D</sup> (GA, NO, FUR)                          | <b>.945</b>           |                 |                  |             | 0.927         |
| Manipulation Target <sup>D</sup> (FUR)                     | <b>.803</b>           |                 |                  |             | 0.885         |
| Proximity <sup>D</sup> (GA, NO, NF, FUR)                   | <b>.801</b>           |                 |                  |             | 0.893         |
| Food Calls <sup>F</sup> (FUR)                              | .605                  |                 |                  |             | 0.730         |
| Body <sup>L</sup> (GA, NO, NF, FUR, P)                     | <b>-.766</b>          |                 | .466             |             | 0.914         |
| Touch <sup>L</sup> (GA, NF, FUR)                           | <b>-.922</b>          |                 |                  |             | 0.934         |
| Enter <sup>L</sup> (GA, NO, NF, FUR, P)                    |                       |                 | <b>.766</b>      |             | 0.854         |
| Distance <sup>D</sup> (GA, NO, NF, FUR, P)                 | -.471                 |                 | <b>.715</b>      |             | 0.863         |
| Focus <sup>D</sup> (GA, NO, NF, FUR, P)                    |                       |                 | <b>-.917</b>     |             | 0.875         |
| Locomotion <sup>D</sup> (GA, NO, NF, FUR, P)               |                       | <b>.889</b>     |                  |             | 0.940         |
| Compartment Alternations <sup>F</sup> (GA, NO, NF, FUR, P) |                       | <b>.828</b>     |                  |             | 0.913         |
| Stress Behavior <sup>F</sup> (NO, NF, P)                   |                       | .640            |                  |             | 0.655         |
| Vigilance Calls <sup>F</sup> (GA, NO, P)                   |                       | .665            |                  |             | 0.725         |
| Manipulation Target <sup>D</sup> (NF)                      |                       |                 |                  | <b>.934</b> | 0.748         |
| Contact Calls <sup>F</sup> (NO, FUR, P)                    |                       |                 |                  | <b>.752</b> | 0.693         |

7 **Table S7. REFA Personality Structure of Common Marmosets in Wild (BBFS Brazil).** Variable loadings in regularized exploratory factor  
 8 analysis (REFA), unweighted least squares extraction method together with parallel analysis results. Quartimax rotation with Kaiser  
 9 normalization. Loadings >0.4 and <-0.4 were considered as salient, and high loadings >0.7 and <-0.7 are indicated in bold. Communalities  
 10 indicate a proportion of each variable’s variance that can be explained by the principal components. Eigenvalues indicate eigenvalues as  
 11 obtained by the REFA. Percentiles indicate eigenvalues as obtained by parallel analysis with 1000 iterations. Eigenvalues larger than percentiles  
 12 are indicated with asterisk (\*). Spearman’s correlations indicate correspondence of REFA components with corresponding PCA components.

|                                               | Component             |                              |                               |                  |                            | Communalities |
|-----------------------------------------------|-----------------------|------------------------------|-------------------------------|------------------|----------------------------|---------------|
|                                               | Exploration-Avoidance | Boldness-Shyness in Foraging | Boldness-Shyness in Predation | Stress/Vigilance | Sociability-Aggressiveness |               |
| <b>Eigenvalues</b>                            | 3.616*                | 2.712*                       | 1.766                         | 1.507            | 1.382                      |               |
| <b>Percentiles</b>                            | 3.260                 | 2.528                        | 2.071                         | 1.704            | 1.418                      |               |
| <b>% Variance</b>                             | 27.81                 | 20.86                        | 13.58                         | 11.59            | 10.63                      |               |
| <b>P</b>                                      | <0.001                | <0.001                       | <0.001                        | <0.001           | <0.001                     |               |
| <b>r<sub>s</sub></b>                          | 0.955                 | 0.728                        | 0.936                         | 0.808            | 0.697                      |               |
| Focus Target <sup>D</sup> (NF, SR)            | <b>.879</b>           |                              |                               |                  |                            | 0.803         |
| Proximity <sup>D</sup> (NF)                   | <b>.916</b>           |                              |                               |                  |                            | 0.913         |
| Distance <sup>D</sup> (NO, NF)                | <b>-.863</b>          |                              |                               |                  |                            | 0.903         |
| Platform <sup>D</sup> (NO, NF, P)             | <b>.816</b>           |                              |                               |                  |                            | 0.923         |
| Platform <sup>L</sup> (GA, NO, SR)            |                       | <b>.985</b>                  |                               |                  |                            | 0.994         |
| Return <sup>L</sup> (SR)                      |                       | <b>.951</b>                  |                               |                  |                            | 0.993         |
| SUM Calls <sup>F</sup> (NF)                   |                       | <b>.759</b>                  |                               |                  |                            | 0.814         |
| Touch <sup>L</sup> (NO)                       |                       |                              | <b>.951</b>                   |                  |                            | 0.878         |
| Body <sup>L</sup> (P)                         |                       |                              | <b>.737</b>                   |                  |                            | 0.612         |
| Socio-Negative Initiate <sup>F</sup> (NO, NF) |                       |                              |                               |                  | <b>-.610</b>               | 0.513         |
| Socio-Positive Initiate <sup>F</sup> (NO)     |                       |                              |                               |                  | <b>.587</b>                | 0.495         |
| Stress Behavior <sup>F</sup> (GA)             |                       |                              |                               | <b>.810</b>      |                            | 0.626         |
| SUM Calls <sup>F</sup> (NO)                   |                       |                              |                               | .404             |                            | 0.554         |

14 **Table S8. Best-fitting Models (GLMMs) of Personality Traits in Captivity (UVI Austria)** performed on three components obtained from the  
 15 PCA analysis: Exploration-Avoidance, Boldness-Shyness, and Stress/Activity. Significant effects are indicated in bold. Reference groups are  
 16 indicated in parenthesis.

| component             | corrected model         | fixed effects            |       | F            | (df1, df2)     | β-coefficient | ± SE   | P            |
|-----------------------|-------------------------|--------------------------|-------|--------------|----------------|---------------|--------|--------------|
| Exploration-Avoidance | <b>group*age, group</b> |                          |       | 1.219        | (9, 17)        |               |        | 0.346        |
|                       |                         | <b>group (5)</b>         |       | 0.753        | (4, 17)        |               |        | 0.570        |
|                       |                         |                          | 1     |              |                | 3.135         | 14.600 |              |
|                       |                         |                          | 2     |              |                | -0.361        | 1.117  |              |
|                       |                         |                          | 3     |              |                | 0.728         | 1.011  |              |
|                       |                         |                          | 4     |              |                | -0.608        | 1.111  |              |
|                       |                         | <b>group*age (5*age)</b> |       | 2.079        | (5, 17)        |               |        | 0.118        |
|                       |                         |                          | 1*age |              |                | -0.233        | 1.181  |              |
|                       |                         |                          | 2*age |              |                | 0.207         | 0.106  |              |
|                       |                         |                          | 3*age |              |                | -0.070        | 0.082  |              |
|                       |                         |                          | 4*age |              |                | 0.261         | 0.110  |              |
|                       |                         | 5*age                    |       |              | 0.049          | 0.097         |        |              |
| Boldness-Shyness      | <b>group*age, group</b> |                          |       | <b>8.097</b> | <b>(9, 17)</b> |               |        | <b>0.000</b> |
|                       |                         | <b>group (5)</b>         |       | <b>5.422</b> | <b>(4, 17)</b> |               |        | <b>0.005</b> |
|                       |                         |                          | 1     |              |                | -2.486        | 8.145  |              |
|                       |                         |                          | 2     |              |                | 1.376         | 0.623  |              |
|                       |                         |                          | 3     |              |                | -0.502        | 0.564  |              |
|                       |                         |                          | 4     |              |                | 1.250         | 0.620  |              |
|                       |                         | <b>group*age (5*age)</b> |       | <b>9.695</b> | <b>(5, 17)</b> |               |        | <b>0.000</b> |
|                       |                         |                          | 1*age |              |                | 0.405         | 0.659  |              |
|                       |                         |                          | 2*age |              |                | -0.025        | 0.059  |              |
|                       |                         |                          | 3*age |              |                | 0.305         | 0.046  |              |
|                       |                         |                          | 4*age |              |                | -0.017        | 0.061  |              |
|                       |                         | 5*age                    |       |              | 0.092          | 0.054         |        |              |
| Stress/Activity       | <b>group</b>            |                          |       | <b>7.170</b> | <b>(4, 22)</b> |               |        | <b>0.001</b> |
|                       |                         | <b>group (5)</b>         |       | <b>7.170</b> | <b>(4, 22)</b> |               |        | <b>0.001</b> |
|                       |                         |                          | 1     |              |                | 0.692         | 0.494  |              |
|                       |                         |                          | 2     |              |                | 1.055         | 0.419  |              |
|                       |                         |                          | 3     |              |                | -0.982        | 0.371  |              |
|                       |                         |                          | 4     |              |                | -0.067        | 0.449  |              |

17

18

19

20 **Table S9. Best-fitting Models (GLMMs) of Personality Traits in Wild (BBFS Brazil)** performed on five components obtained from the PCA  
 21 analysis: Exploration-Avoidance, Boldness-Shyness in Foraging, Boldness-Shyness in Predation, Sociability-Aggressiveness and  
 22 Stress/Vigilance. Significant effects are indicated in bold. Reference groups are indicated in parenthesis.

| component                     | corrected model         | fixed effects                        |     | F             | (df1, df2)    | β-coefficient | ± SE  | P            |
|-------------------------------|-------------------------|--------------------------------------|-----|---------------|---------------|---------------|-------|--------------|
| Exploration-Avoidance         | <b>group, group*age</b> |                                      |     | <b>6.164</b>  | <b>(9, 8)</b> |               |       | <b>0.009</b> |
|                               |                         | <b>group (5)</b>                     |     | <b>10.226</b> | <b>(4, 8)</b> |               |       | <b>0.003</b> |
|                               |                         |                                      | 1   |               |               | 0.185         | 0.634 |              |
|                               |                         |                                      | 2   |               |               | 2.363         | 0.634 |              |
|                               |                         |                                      | 3   |               |               | -0.012        | 0.518 |              |
|                               |                         |                                      | 4   |               |               | 2.479         | 0.634 |              |
|                               |                         | <b>group*age</b>                     |     | <b>3.099</b>  | <b>(5, 8)</b> |               |       | <b>0.075</b> |
|                               |                         | (group=1)*(age=3)                    | 1*1 |               |               | 0.507         | 0.634 |              |
|                               |                         | (group=2)*(age=3)                    | 2*1 |               |               | -0.484        | 0.598 |              |
|                               |                         | (group=3)*(age=2)                    | 3*1 |               |               | -0.222        | 0.518 |              |
|                               |                         | (group=4)*(age=3)                    | 4*1 |               |               | -2.318        | 0.634 |              |
|                               | (group=5)*(age=3)       | 5*1                                  |     |               | 0.414         | 0.518         |       |              |
| Boldness-Shyness in Foraging  | <b>group, group*age</b> |                                      |     | 1.107         | (9, 8)        |               |       | 0.448        |
|                               |                         | <b>group (5)</b>                     |     | 1.765         | (4, 8)        |               |       | 0.229        |
|                               |                         |                                      | 1   |               |               | -0.145        | 1.192 |              |
|                               |                         |                                      | 2   |               |               | 0.370         | 1.192 |              |
|                               |                         |                                      | 3   |               |               | -0.021        | 0.973 |              |
|                               |                         |                                      | 4   |               |               | 1.298         | 1.192 |              |
|                               |                         | <b>group*age</b>                     |     | <b>0.145</b>  | <b>(5, 8)</b> |               |       | <b>0.976</b> |
|                               |                         | (group=1)*(age=3)                    | 1*1 |               |               | 0.213         | 1.192 |              |
|                               |                         | (group=2)*(age=3)                    | 2*1 |               |               | -0.046        | 1.123 |              |
|                               |                         | (group=3)*(age=2)                    | 3*1 |               |               | 0.048         | 0.973 |              |
|                               |                         | (group=4)*(age=3)                    | 4*1 |               |               | 0.973         | 1.192 |              |
|                               | (group=5)*(age=3)       | 5*1                                  |     |               | 0.141         | 0.973         |       |              |
| Boldness-Shyness in Predation | <b>group*age</b>        |                                      |     | 2.303         | (9, 8)        |               |       | 0.127        |
|                               |                         | <b>group*age ((group=5)*(age=3))</b> |     | 2.303         | (9, 8)        |               |       | 0.127        |
|                               |                         |                                      | 1*1 |               |               | -0.344        | 0.769 |              |
|                               |                         |                                      | 1*3 |               |               | -0.467        | 0.942 |              |
|                               |                         |                                      | 2*1 |               |               | -0.422        | 0.702 |              |
|                               |                         |                                      | 2*3 |               |               | 0.040         | 0.942 |              |
|                               |                         |                                      | 3*1 |               |               | -1.400        | 0.769 |              |
|                               |                         |                                      | 3*2 |               |               | -1.063        | 0.769 |              |
|                               |                         |                                      | 4*1 |               |               | -0.351        | 0.769 |              |
|                               |                         |                                      | 4*3 |               |               | -2.938        | 0.942 |              |
|                               |                         |                                      | 5*1 |               |               | -2.128        | 0.769 |              |
| Sociability-Aggressiveness    | <b>age, group*age</b>   |                                      |     | 2.697         | (9, 8)        |               |       | 0.089        |
|                               |                         | <b>age (3)</b>                       |     | 7.253         | (2, 8)        |               |       | 0.016        |
|                               |                         |                                      | 1   |               |               | -1.294        | 0.726 |              |
|                               |                         | 2                                    |     |               | 0.897         | 0.726         |       |              |



|  |  |                                      |     |       |        |        |       |       |
|--|--|--------------------------------------|-----|-------|--------|--------|-------|-------|
|  |  | group*age                            |     | 1.730 | (7, 8) |        |       | 0.229 |
|  |  | (group=5)*(age=1); (group=3)*(age=2) | 1*1 |       |        | 0.573  | 0.726 |       |
|  |  |                                      | 2*1 |       |        | 1.163  | 0.663 |       |
|  |  |                                      | 3*1 |       |        | 0.957  | 0.726 |       |
|  |  |                                      | 4*1 |       |        | 1.106  | 0.726 |       |
|  |  | (group=5)*(age=3)                    | 1*3 |       |        | 2.483  | 0.889 |       |
|  |  |                                      | 2*3 |       |        | 0.437  | 0.889 |       |
|  |  |                                      | 4*3 |       |        | 0.311  | 0.889 |       |
|  |  |                                      |     |       |        |        |       |       |
|  |  | group*age                            |     | 1.562 | (9, 8) |        |       | 0.271 |
|  |  | group*age ((group=5)*(age=3))        |     | 1.562 | (9, 8) |        |       | 0.271 |
|  |  |                                      | 1*1 |       |        | -0.218 | 0.878 |       |
|  |  |                                      | 1*3 |       |        | 1.054  | 1.075 |       |
|  |  |                                      | 2*1 |       |        | -0.765 | 0.801 |       |
|  |  |                                      | 2*3 |       |        | -1.743 | 1.075 |       |
|  |  |                                      | 3*1 |       |        | -1.128 | 0.878 |       |
|  |  |                                      | 3*2 |       |        | -0.963 | 0.878 |       |
|  |  |                                      | 4*1 |       |        | 0.717  | 0.878 |       |
|  |  |                                      | 4*3 |       |        | 1.011  | 1.075 |       |
|  |  |                                      | 5*1 |       |        | -0.162 | 0.878 |       |

23

24

25 **Table S10. Comparisons of Personality Components and Breeding Status in Common Marmosets in UVI Austria and BBFS Brazil,**  
 26 using Mann-Whitney U-tests. Significant differences in personality components between individuals of different breeding status are indicated in  
 27 bold.

| Study Site  | Component                     | Breeding Status |               |              |
|-------------|-------------------------------|-----------------|---------------|--------------|
|             |                               | U               | Z             | P            |
| UVI Austria | Exploration-Avoidance         | 76.000          | 0.000         | 1.000        |
|             | Boldness-Shyness              | 55.000          | -1.115        | 0.265        |
|             | Stress/Activity               | 72.000          | -0.212        | 0.832        |
| BBFS Brazil | Exploration-Avoidance         | 40.000          | 0.000         | 1.000        |
|             | Boldness-Shyness in Foraging  | 27.000          | -1.155        | 0.248        |
|             | Boldness-Shyness in Predation | 30.000          | -0.889        | 0.374        |
|             | Sociability-Aggressiveness    | <b>11.000</b>   | <b>-2.577</b> | <b>0.010</b> |
|             | Stress/Vigilance              | 37.000          | -0.267        | 0.790        |

28

29

30 **Table S11. PCA Personality Structure of Common Marmosets in Captivity (UVI Austria), in PTB1.** Variable loadings in a principal  
 31 component analysis (PCA), loadings >0.4 and <-0.4 were considered as salient, and high loadings >0.7 and <-0.7 are indicated in bold (Table is  
 32 adapted from Table 1, Šlipogor et al. 2016).

| Component                     | Behavioral Variables                                                                                                      |
|-------------------------------|---------------------------------------------------------------------------------------------------------------------------|
| Boldness-Shyness in Foraging  | <b>(-0.930) Manipulation, tFUR; (-0.852) Proximity, mean</b>                                                              |
|                               | (+0.632) Distance, mean; <b>(+0.784) Vigilance calls, tFUR; (+0.890) Body latency, tFUR; (+0.934) Touch latency, tFUR</b> |
| Boldness-Shyness in Predation | <b>(-0.846) Body latency, tP; (-0.616) Distance, mean; (-0.442) Vigilance calls, tP</b>                                   |
|                               | (+0.413) Proximity, mean; (+0.478) Stress behavior, tNF; <b>(+0.910) Contact calls, tP</b>                                |
| Stress-Activity               | (-0.493) Touch latency, tNF; (-0.438) Manipulation, tNF                                                                   |
|                               | <b>(+0.800) Locomotion, mean; (+0.804) Stress behavior, tNF; (+0.897) Compartment alternations, mean</b>                  |
| Exploration-Avoidance         | (-0.616) Manipulation, tNF                                                                                                |
|                               | (+0.689) Touch latency, tNF; <b>(+0.794) Self-grooming, mean; (+0.824) Contact calls, GA</b>                              |
